# Supplementary material for: Effects of Black Soldier Fly Larvae (Hermetia illucens Larvae) Meal on the Production Performance and Cecal Microbiota of Hens
Source: MDPI journal article supplement (doi:10.3390/vetsci10050364), 2023-05-19
Supplement: s1 [file s1]

## Supplementary Materials:

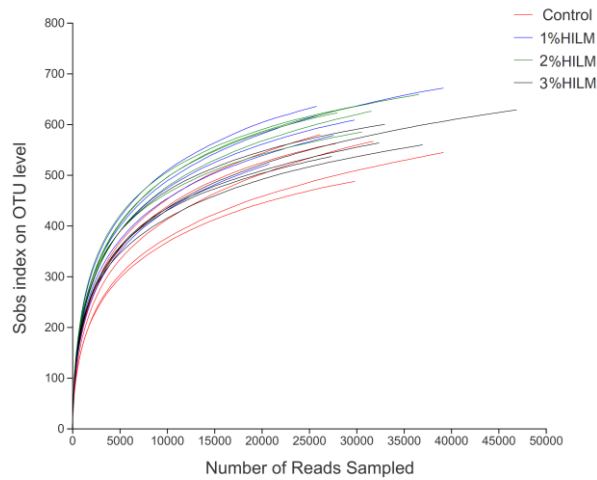

**Figure S1.** Rarefaction curves. Abscissa represents the amount of sequencing data randomly selected; Ordinate represents observed species number (sobs index). Control:based deit; 1% HILM: based deit + 1% *Hermetia illucens* larvae meal group; 2 % HILM: based deit + 2% *Hermetia illucens* larvae meal group; 3% HILM: based deit + 3% *Hermetia illucens* larvae meal group.

**Table S1.** One-way ANOVA test data at the Phylum level /% \*.

| Species Name                              | Control <sup>#</sup>        | 1% HILM <sup>#</sup>        | 2% HILM <sup>#</sup>        | 3% HILM <sup>#</sup>        | p-Value |
|-------------------------------------------|-----------------------------|-----------------------------|-----------------------------|-----------------------------|---------|
| <i>Bacteroidetes</i>                      | 76.460 ± 5.209 <sup>a</sup> | 62.060 ± 1.716 <sup>b</sup> | 53.880 ± 1.996 <sup>c</sup> | 45.950 ± 2.636 <sup>d</sup> | <0.001  |
| <i>Firmicutes</i>                         | 19.420 ± 4.606 <sup>c</sup> | 31.750 ± 1.852 <sup>b</sup> | 41.910 ± 1.720 <sup>a</sup> | 45.880 ± 2.632 <sup>a</sup> | <0.001  |
| <i>Actinobacteria</i>                     | 1.559 ± 0.649               | 3.190 ± 1.851               | 1.723 ± 0.823               | 3.708 ± 2.093               | 0.1626  |
| <i>Proteobacteria</i>                     | 0.343 ± 0.194               | 0.800 ± 0.560               | 0.814 ± 0.464               | 1.579 ± 1.980               | 0.1558  |
| <i>Spirochaetes</i>                       | 1.469 ± 1.125               | 0.285 ± 0.169               | 0.344 ± 0.152               | 0.605 ± 0.762               | 0.2306  |
| <i>Patescibacteria</i>                    | 0.163 ± 0.141               | 0.521 ± 0.437               | 0.150 ± 0.149               | 0.975 ± 1.172               | 0.2608  |
| <i>Tenericutes</i>                        | 0.177 ± 0.150               | 0.326 ± 0.126               | 0.524 ± 0.285               | 0.442 ± 0.304               | 0.1586  |
| <i>Synergistetes</i>                      | 0.087 ± 0.019               | 0.309 ± 0.158               | 0.109 ± 0.072               | 0.374 ± 0.553               | 0.0926  |
| <i>Epsilonbacteraeota</i>                 | 0.068 ± 0.026               | 0.181 ± 0.160               | 0.105 ± 0.070               | 0.299 ± 0.177               | 0.0910  |
| <i>Deferribacteres</i>                    | 0.082 ± 0.084               | 0.201 ± 0.129               | 0.177 ± 0.190               | 0.095 ± 0.084               | 0.3988  |
| WPS-2                                     | 0.077 ± 0.094               | 0.089 ± 0.117               | 0.145 ± 0.201               | 0.052 ± 0.090               | 0.8326  |
| <i>unclassified_k__norank_d__Bacteria</i> | 0.034 ± 0.039               | 0.111 ± 0.211               | 0.032 ± 0.033               | 0.012 ± 0.009               | 0.4005  |
| <i>Verrucomicrobia</i>                    | 0.021 ± 0.040               | 0.089 ± 0.180               | 0.007 ± 0.007               | 0.010 ± 0.015               | 0.6911  |
| <i>Elusimicrobia</i>                      | 0.026 ± 0.038               | 0.029 ± 0.013               | 0.054 ± 0.062               | 0.012 ± 0.024               | 0.4924  |
| <i>Cyanobacteria</i>                      | 0.012 ± 0.008               | 0.046 ± 0.051               | 0.012 ± 0.012               | 0.009 ± 0.013               | 0.5744  |

\* This table shows the Phylum with average relative abundance in the top 15; datas were "Mean ± SEM";. # Control:based deit; 1% HILM: based deit + 1% *Hermetia illucens* larvae meal group; 2% HILM: based deit + 2% *Hermetia illucens* larvae meal group; 3% HILM: based deit + 3% *Hermetia illucens* larvae meal group. a, b, c. Means not sharing the same superscripts in a row differ significantly (  $p \leq 0.05$ ).

**Table S2.** One-way ANOVA test data at the Family level /% \*.

| Species Name                         | Control <sup>†</sup>        | 1% HILM <sup>†</sup>         | 2% HILM <sup>†</sup>         | 3% HILM <sup>†</sup>         | p-Value |
|--------------------------------------|-----------------------------|------------------------------|------------------------------|------------------------------|---------|
| <i>Rikenellaceae</i>                 | 30.750 ± 8.415 <sup>a</sup> | 24.830 ± 3.922 <sup>ab</sup> | 24.750 ± 3.556 <sup>ab</sup> | 17.170 ± 3.582 <sup>b</sup>  | 0.0195  |
| <i>Bacteroidaceae</i>                | 33.070 ± 5.459 <sup>a</sup> | 26.640 ± 4.033 <sup>ab</sup> | 17.240 ± 1.189 <sup>cd</sup> | 20.440 ± 5.213 <sup>bd</sup> | 0.0010  |
| <i>Ruminococcaceae</i>               | 8.257 ± 2.330 <sup>b</sup>  | 14.220 ± 3.103 <sup>ab</sup> | 16.550 ± 3.909 <sup>a</sup>  | 20.190 ± 6.248 <sup>a</sup>  | 0.0054  |
| <i>Lachnospiraceae</i>               | 7.521 ± 2.392 <sup>cd</sup> | 11.230 ± 1.761 <sup>bc</sup> | 15.830 ± 3.731 <sup>ab</sup> | 17.890 ± 4.032 <sup>a</sup>  | 0.0043  |
| <i>unclassified_o__Bacteroidales</i> | 4.609 ± 2.170               | 4.093 ± 1.144                | 5.831 ± 2.009                | 3.077 ± 0.535                | 0.0696  |
| <i>Prevotellaceae</i>                | 4.842 ± 1.066 <sup>a</sup>  | 2.274 ± 1.175 <sup>b</sup>   | 1.418 ± 0.767 <sup>b</sup>   | 1.534 ± 0.986 <sup>b</sup>   | 0.0025  |
| <i>Atopobiaceae</i>                  | 1.037 ± 0.509               | 2.303 ± 1.391                | 1.015 ± 0.649                | 1.977 ± 1.087                | 0.2046  |
| <i>Tannerellaceae</i>                | 0.752 ± 0.401               | 1.586 ± 0.783                | 1.529 ± 0.722                | 0.944 ± 0.304                | 0.1655  |
| <i>Peptococcaceae</i>                | 0.849 ± 0.447               | 1.225 ± 0.760                | 1.269 ± 0.372                | 0.998 ± 0.260                | 0.4690  |
| <i>Erysipelotrichaceae</i>           | 0.424 ± 0.214 <sup>b</sup>  | 0.580 ± 0.329 <sup>b</sup>   | 1.851 ± 0.629 <sup>a</sup>   | 1.378 ± 0.460 <sup>a</sup>   | 0.0034  |
| <i>Muribaculaceae</i>                | 0.901 ± 0.688               | 0.990 ± 0.450                | 1.257 ± 0.966                | 1.029 ± 1.103                | 0.9378  |
| <i>Peptostreptococcaceae</i>         | 0.258 ± 0.326 <sup>cd</sup> | 0.324 ± 0.288 <sup>cd</sup>  | 2.035 ± 1.057 <sup>ab</sup>  | 1.230 ± 0.877 <sup>bd</sup>  | 0.0280  |
| <i>Christensenellaceae</i>           | 0.349 ± 0.128 <sup>c</sup>  | 0.726 ± 0.369 <sup>bc</sup>  | 1.268 ± 0.273 <sup>ab</sup>  | 1.312 ± 0.721 <sup>ab</sup>  | 0.0012  |
| <i>Acidaminococcaceae</i>            | 0.867 ± 0.709               | 1.697 ± 1.786                | 0.287 ± 0.242                | 0.594 ± 0.616                | 0.2263  |
| <i>Barnesiellaceae</i>               | 0.501 ± 0.396               | 0.815 ± 0.662                | 1.026 ± 0.590                | 1.015 ± 0.680                | 0.3918  |

\* This table shows the Family with average relative abundance in the top 15; datas were “Mean ± SEM”; # Control:based deit; 1% HILM: based deit + 1% *Hermetia illucens* larvae meal group; 2% HILM: based deit + 2% *Hermetia illucens* larvae meal group; 3% HILM: based deit + 3% *Hermetia illucens* larvae meal group. a, b, c Means not sharing the same superscripts in a row differ significantly ( $p \leq 0.05$ ).

**Table S3.** One-way ANOVA test data at the Genus level /% \*.

| Species Name                                  | Control <sup>†</sup>         | 1% HILM <sup>†</sup>         | 2% HILM <sup>†</sup>         | 3% HILM <sup>†</sup>        | p-Value |
|-----------------------------------------------|------------------------------|------------------------------|------------------------------|-----------------------------|---------|
| <i>Bacteroides</i>                            | 33.070 ± 5.459 <sup>ab</sup> | 26.640 ± 4.033 <sup>bc</sup> | 17.240 ± 1.189 <sup>d</sup>  | 20.440 ± 5.213 <sup>c</sup> | 0.0010  |
| <i>Rikenellaceae_RC9_gut_group</i>            | 29.070 ± 9.097 <sup>a</sup>  | 21.340 ± 4.238 <sup>a</sup>  | 20.730 ± 3.580 <sup>ab</sup> | 11.370 ± 2.419 <sup>b</sup> | 0.0016  |
| <i>Ruminococcus_torques_group</i>             | 3.388 ± 1.029 <sup>cd</sup>  | 4.906 ± 2.187 <sup>bd</sup>  | 7.777 ± 2.185 <sup>ab</sup>  | 10.360 ± 2.792 <sup>a</sup> | 0.0030  |
| <i>unclassified_f_Lachnospiraceae</i>         | 2.229 ± 0.822 <sup>b</sup>   | 3.382 ± 0.779 <sup>ab</sup>  | 4.346 ± 1.486 <sup>a</sup>   | 4.781 ± 1.225 <sup>a</sup>  | 0.0235  |
| <i>unclassified_f_Ruminococcaceae</i>         | 1.088 ± 0.126 <sup>b</sup>   | 2.106 ± 0.655 <sup>b</sup>   | 1.977 ± 0.544 <sup>b</sup>   | 3.402 ± 0.815 <sup>a</sup>  | 0.0013  |
| <i>Shuttleworthia</i>                         | 1.049 ± 0.574 <sup>ab</sup>  | 1.342 ± 0.597 <sup>ab</sup>  | 1.991 ± 0.697 <sup>a</sup>   | 0.690 ± 0.223 <sup>b</sup>  | 0.0233  |
| <i>Prevotellaceae_UCG-001</i>                 | 2.001 ± 0.618 <sup>a</sup>   | 1.085 ± 0.241 <sup>b</sup>   | 0.757 ± 0.371 <sup>b</sup>   | 0.627 ± 0.375 <sup>b</sup>  | 0.0172  |
| <i>Romboutsia</i>                             | 0.250 ± 0.319 <sup>b</sup>   | 0.285 ± 0.273 <sup>b</sup>   | 1.948 ± 1.039 <sup>a</sup>   | 1.204 ± 0.844 <sup>ab</sup> | 0.0286  |
| <i>Christensenellaceae_R-7_group</i>          | 0.337 ± 0.128 <sup>b</sup>   | 0.701 ± 0.354 <sup>ab</sup>  | 1.231 ± 0.271 <sup>a</sup>   | 1.279 ± 0.720 <sup>a</sup>  | 0.0014  |
| <i>Ruminococcaceae_UCG-010</i>                | 0.322 ± 0.160 <sup>b</sup>   | 0.538 ± 0.266 <sup>b</sup>   | 1.406 ± 0.407 <sup>a</sup>   | 1.147 ± 0.244 <sup>a</sup>  | 0.0006  |
| <i>norank_f_Clostridiales_vadinBB60_group</i> | 0.409 ± 0.206 <sup>b</sup>   | 0.856 ± 0.128 <sup>ab</sup>  | 1.248 ± 0.547 <sup>a</sup>   | 0.639 ± 0.565 <sup>ab</sup> | 0.0184  |
| <i>Alloprevotella</i>                         | 1.531 ± 0.939 <sup>a</sup>   | 0.158 ± 0.147 <sup>b</sup>   | 0.074 ± 0.038 <sup>b</sup>   | 0.287 ± 0.178 <sup>b</sup>  | 0.0276  |
| <i>Ruminococcaceae_UCG-013</i>                | 0.209 ± 0.140 <sup>b</sup>   | 0.437 ± 0.311 <sup>ab</sup>  | 0.676 ± 0.208 <sup>a</sup>   | 0.268 ± 0.148 <sup>b</sup>  | 0.0214  |
| <i>Turicibacter</i>                           | 0.141 ± 0.129 <sup>b</sup>   | 0.081 ± 0.082 <sup>b</sup>   | 0.883 ± 0.368 <sup>a</sup>   | 0.404 ± 0.254 <sup>b</sup>  | 0.0083  |
| <i>Lactobacillus</i>                          | 0.108 ± 0.070                | 0.326 ± 0.311                | 0.296 ± 0.094                | 0.284 ± 0.180               | 0.0391  |
| <i>norank_f_Ruminococcaceae</i>               | 0.087 ± 0.031 <sup>b</sup>   | 0.333 ± 0.215 <sup>a</sup>   | 0.187 ± 0.053 <sup>ab</sup>  | 0.387 ± 0.108 <sup>a</sup>  | 0.0017  |
| <i>Sphaerochaeta</i>                          | 0.402 ± 0.202 <sup>a</sup>   | 0.261 ± 0.178 <sup>ab</sup>  | 0.174 ± 0.112 <sup>ab</sup>  | 0.043 ± 0.028 <sup>b</sup>  | 0.0124  |
| <i>Family_XIII_AD3011_group</i>               | 0.053 ± 0.019 <sup>b</sup>   | 0.108 ± 0.048 <sup>b</sup>   | 0.240 ± 0.108 <sup>a</sup>   | 0.166 ± 0.064 <sup>ab</sup> | 0.0074  |
| <i>unclassified_f_Prevotellaceae</i>          | 0.238 ± 0.091 <sup>a</sup>   | 0.152 ± 0.064 <sup>ab</sup>  | 0.079 ± 0.059 <sup>b</sup>   | 0.065 ± 0.053 <sup>b</sup>  | 0.0284  |
| <i>unclassified_f_Eggerthellaceae</i>         | 0.035 ± 0.019                | 0.090 ± 0.014                | 0.073 ± 0.030                | 0.164 ± 0.144               | 0.0074  |
| <i>Eubacterium_nodatum_group</i>              | 0.026 ± 0.012 <sup>b</sup>   | 0.052 ± 0.016 <sup>b</sup>   | 0.097 ± 0.032 <sup>a</sup>   | 0.108 ± 0.016 <sup>a</sup>  | 0.0001  |

\* This table shows the genus with significant difference ( $p \leq 0.05$ ) and abundance > 0.02%; datas were “Mean ± SEM”; <sup>†</sup> Control:based deit; 1% HILM: based deit + 1% *Hermetia illucens* larvae meal group; 2% HILM: based deit + 2% *Hermetia illucens* larvae meal group; 3% HILM: based deit + 3% *Hermetia illucens* larvae meal group. a, b, c Means not sharing the same superscripts in a row differ significantly ( $p \leq 0.05$ ).
